# Supplementary material
Source: PubMed Central journal article supplement (PMC3262888)
Supplement: NIHMS341506-supplement-1.pdf [file NIHMS341506-supplement-1.pdf]

**Mice completely lacking immunoproteasomes display major alterations in antigen presentation.**

**Authors:**

Eleanor Z Kincaid<sup>1</sup>, Jenny W Che<sup>1</sup>, Ian York<sup>2</sup>, Hernando Escobar<sup>3</sup>, Eduardo Reyes-Vargas<sup>3</sup>, Julio C. Delgado<sup>3</sup>, Raymond M Welsh<sup>1</sup>, Margaret L. Karow<sup>4</sup>, Andrew J. Murphy<sup>4</sup>, David M. Valenzuela<sup>4</sup>, George D. Yancopoulos<sup>4</sup> and Kenneth L Rock<sup>1</sup>

<sup>1</sup>Department of Pathology, UMass Medical School. Worcester, MA

<sup>2</sup>CDC/NCIRD, Influenza Division-Molecular Virology and Vaccine Branch, Atlanta GA.

<sup>3</sup>ARUP Institute for Clinical and Experimental Pathology, Department of Pathology, University of Utah School of Medicine, Salt Lake City, UT

<sup>4</sup>Regeneron Pharmaceuticals Inc., Tarrytown, NY 10591

Correspondence should be addressed to K.R. (kenneth.rock@umassmed.edu).

Supplementary Figure 1.

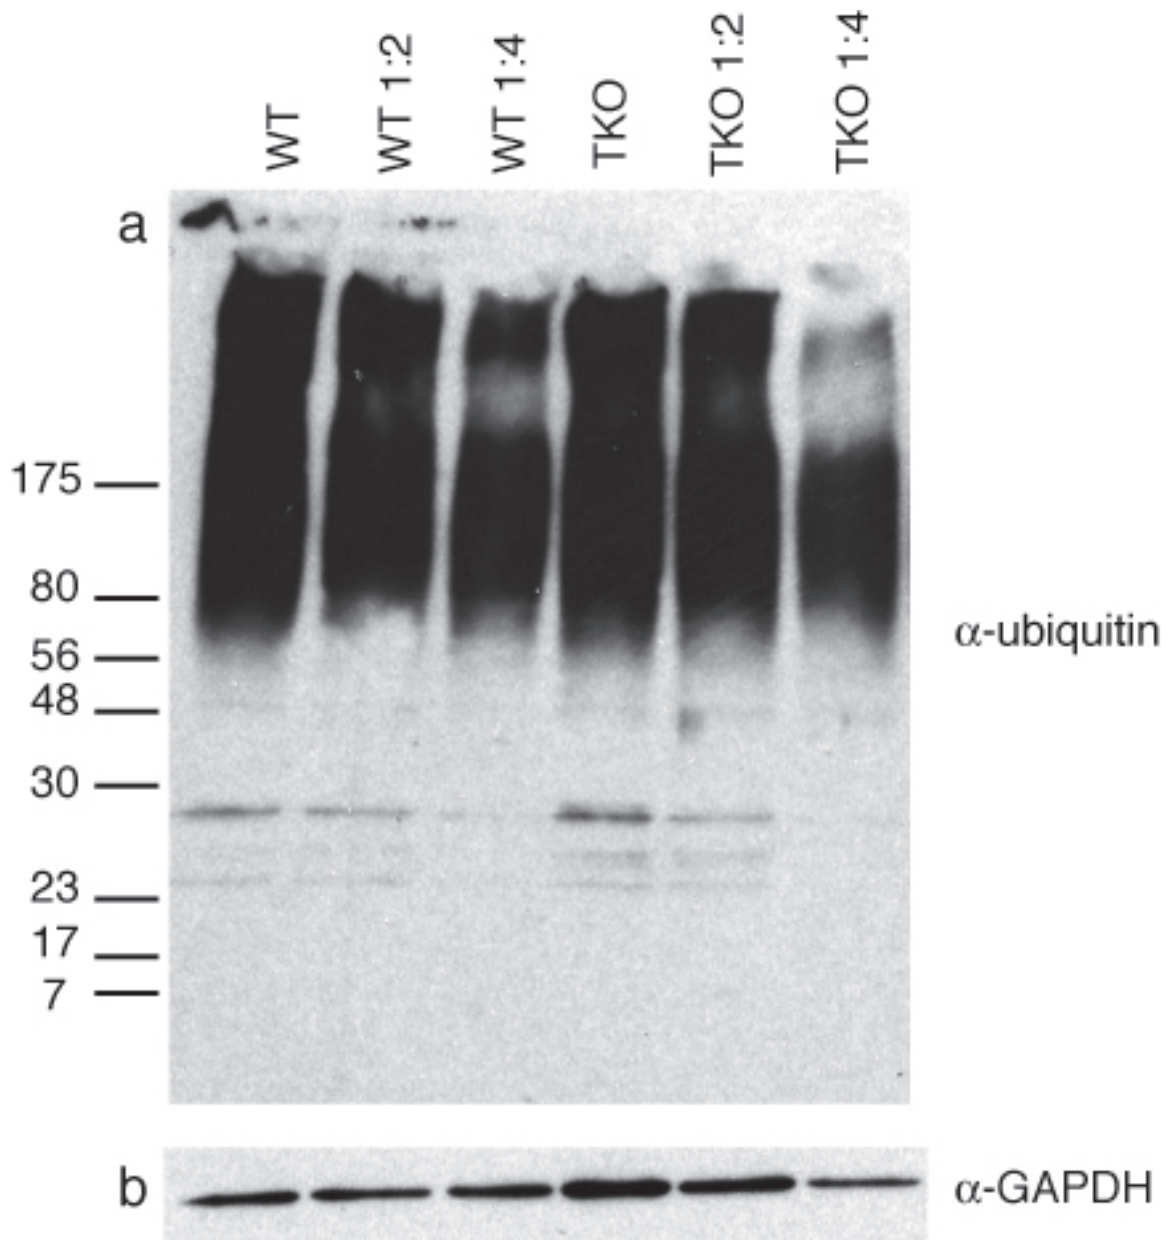

**Steady-state ubiquitylation in TKO splenocytes.** Western blots of serial dilutions (20 $\mu$ g, 10 $\mu$ g and 5 $\mu$ g) of whole cell lysates from WT and TKO splenocytes. After probing with (a) anti-ubiquitin, blot was stripped with Millipore Re-blot and reprobbed with (b) GAPDH as a loading control. (Representative of 2 experiments.)

**Supplementary Figure 2.**

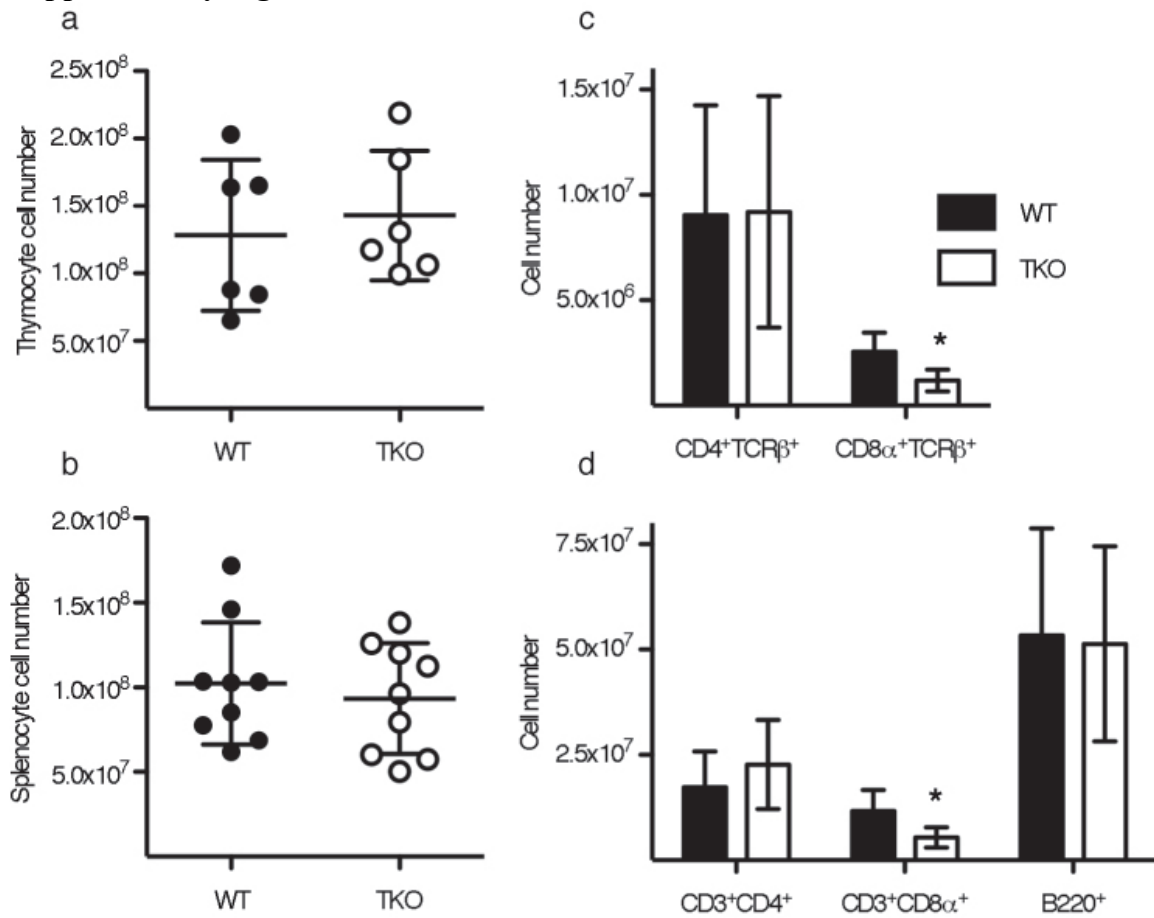

**Cell numbers in WT and TKO thymus and spleen.** Organs were harvested from mice of the indicated strains. Thymocytes and splenocytes (after red blood cell lysis) were counted. Thymocytes were stained with anti-TCRβ, anti-CD4, and anti-CD8α. Splenocytes were stained with anti-B220, anti-CD3 molecular complex and anti-CD4, and anti-CD8α. Scatter plots indicate individual animals with mean +/- SD indicated. Bar graphs indicate mean +/- Asterisks indicate a significant difference from WT (P < 0.05, student's t-test, n of 6 or 9 for each strain, combined from 2 experiments).

**Supplementary Figure 3.**

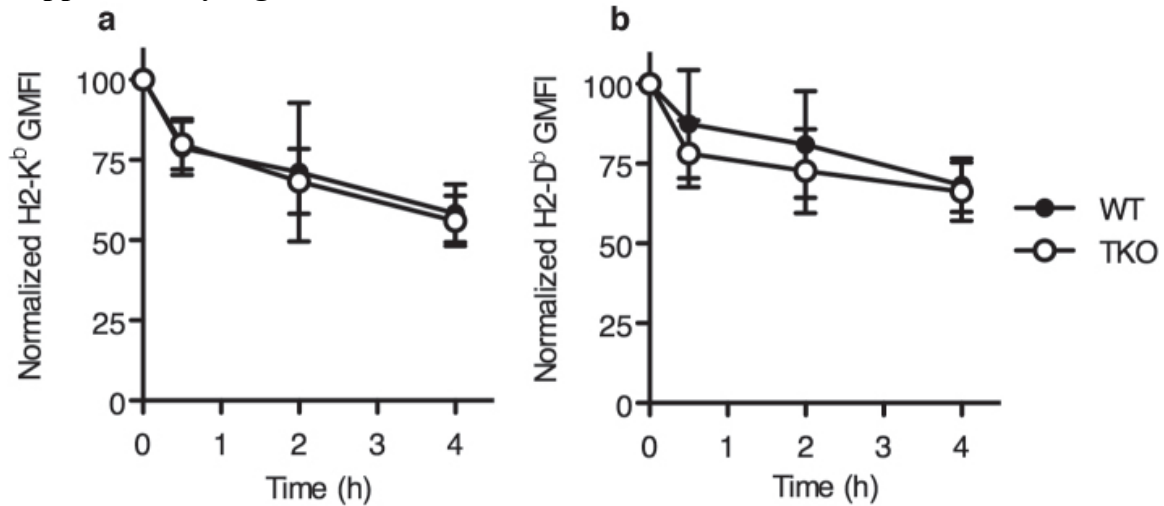

**Stability of pMHC I complexes on the cell surface of TKO splenocytes.** Splenocytes from WT and TKO animals were treated with 1 $\mu$ l/ml GolgiPlug (BDBioscience) at 37<sup>0</sup>C for the indicated times before surface Ab staining and flow cytometry. Data is mean +/- SD of 3 animals from each strain, combined from 3 experiments. Splenocytes from each animal were treated and stained in triplicate, and the mean from each animal was used. H2-K<sup>b</sup> or H2-D<sup>b</sup> GMFI was normalized to time 0 (no treatment) for each strain in each experiment. No significant difference was found between WT and TKO samples (two-way ANOVA).

**Supplementary Figure 4.**

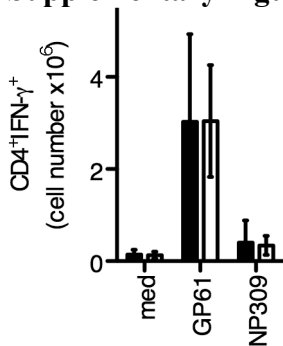

**CD4 responses are normal in LCMV-infected TKO animals.** WT and TKO animals were infected with LCMV, and 9 days later, spleen lymphocytes were analyzed by *in vitro* restimulation followed by surface and intracellular staining. Mean and SD of 18 animals, combined from 4 experiments.

**Supplementary Figure 5.**

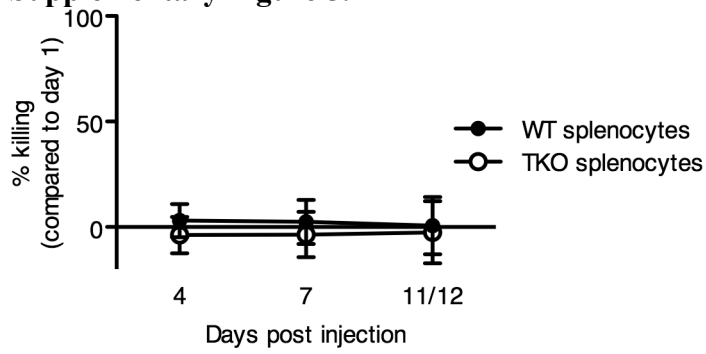

**WT hosts do not reject TKO splenocytes.** WT mice were injected with WT and KO cells differentially labeled with CFSE. Mice were bled at the indicated times, and the relative killing of WT and TKO cells was assessed. Mean  $\pm$ SD from 14 mice, 3 experiments.

**Supplemental Table 1. WT H2-D<sup>b</sup> peptides.**

| <b>Accession number</b> | <b>Peptide</b> | <b>mass-to-charge ratio</b> | <b>Protein entry name</b>                                                  |
|-------------------------|----------------|-----------------------------|----------------------------------------------------------------------------|
| A2AIV2                  | RQILNADAM      | 1031.531                    | Protein virilizer homolog                                                  |
| A3KGF7                  | TQPLNHYFI      | 1132.579                    | 1-phosphatidylinositol-4,5-bisphosphate phosphodiesterase beta-2           |
| B1AXP6                  | SSIRNFLIYV     | 1211.704                    | Mitochondrial import receptor subunit TOM5 homolog                         |
| O08808                  | MMHSNMETL      | 1093.448                    | Protein diaphanous homolog 1                                               |
| O35598                  | SGIRNISFM      | 1024.525                    | ADAM 10                                                                    |
| O35604                  | VAVVNKVDI      | 956.578                     | Niemann-Pick C1 protein                                                    |
| O35737                  | FSPLNPVRV      | 1028.589                    | Heterogeneous nuclear ribonucleoprotein H                                  |
| O55222                  | FSHPNVLPV      | 1009.547                    | Integrin-linked protein kinase                                             |
| O88491                  | ASMINVEYL      | 1039.513                    | Histone-lysine N-methyltransferase, H3 lysine-36 and H4 lysine-20 specific |
| P01899                  | FAYEGRDYI      | 1133.527                    | H-2 class I histocompatibility antigen, D-B alpha chain                    |
| P04441                  | SQMRMATPL      | 1034.513                    | H-2 class II histocompatibility antigen gamma chain                        |
| P07742                  | FQIVNPHLL      | 1080.621                    | Ribonucleoside-diphosphate reductase large subunit                         |
| P07742                  | YGIRNSLLI      | 1048.616                    | Ribonucleoside-diphosphate reductase large subunit                         |
| P08775                  | VVVENNELI      | 971.541                     | DNA-directed RNA polymerase II subunit RPB1                                |
| P09581                  | FAPKNIYSI      | 1052.578                    | Macrophage colony-stimulating factor 1 receptor                            |
| P10126                  | FAPVNVTEV      | 1076.563                    | Elongation factor 1-alpha 1                                                |
| P10126                  | FAPVNVTEVKSV   | 1390.758                    | Elongation factor 1-alpha 1                                                |
| P14576                  | ATIINEEVL      | 1001.552                    | Signal recognition particle 54 kDa protein                                 |
| P14901                  | IQAENAEFM      | 1052.472                    | Heme oxygenase 1                                                           |
| P16277                  | RSLDNGGYYI     | 1157.559                    | Tyrosine-protein kinase BLK                                                |
| P16546                  | KALINADEL      | 986.552                     | Spectrin alpha chain, brain                                                |
| P16858                  | SAPSADAPMFV    | 1092.504                    | Glyceraldehyde-3-phosphate dehydrogenase                                   |
| P16858                  | SAPSADAPMFVM   | 1223.544                    | Glyceraldehyde-3-phosphate dehydrogenase                                   |
| P17918                  | AMGVNLTSM      | 923.433                     | Proliferating cell nuclear antigen                                         |
| P19096                  | TALENLSTL      | 961.521                     | Fatty acid synthase                                                        |
| P19973                  | RQPSIELPSM     | 1157.599                    | Lymphocyte-specific protein 1                                              |
| P23492                  | SLITNKVVM      | 1004.581                    | Purine nucleoside phosphorylase                                            |
| P24547                  | GGIQNVGHI      | 894.48                      | Inosine-5'-monophosphate dehydrogenase 2                                   |
| P24638                  | RSIQNAQFL      | 1076.585                    | Lysosomal acid phosphatase                                                 |
| P26039                  | SVMENSKVLGEAM  | 1394.666                    | Talin-1                                                                    |
| P26039                  | VMVTNVTSL      | 963.519                     | Talin-1                                                                    |
| P27005                  | VQNINIENL      | 1056.569                    | Protein S100-A8                                                            |
| P27773                  | FAHTNIESL      | 1031.516                    | Protein disulfide-isomerase A3                                             |
| P28063                  | GGVVNMYHM      | 1007.444                    | Proteasome subunit beta type-8                                             |
| P28658                  | NSIRNLDTI      | 1045.564                    | Ataxin-10                                                                  |
| P35278                  | AMNVNEIFM      | 1068.486                    | Ras-related protein Rab-5C                                                 |
| P42228                  | SILVNQEVL      | 1014.584                    | Signal transducer and activator of transcription 4                         |
| P46414                  | FGPVNHEEL      | 1041.501                    | Cyclin-dependent kinase inhibitor 1B                                       |
| P48410                  | AALVSRFTL      | 977.578                     | ATP-binding cassette sub-family D member 1                                 |
| P51943                  | VSLLNPPETL     | 1082.61                     | Cyclin-A2                                                                  |
| P55194                  | ALIQNADTL      | 958.521                     | SH3 domain-binding protein 1                                               |
| P55264                  | SAVVDKDFL      | 993.526                     | Adenosine kinase                                                           |
| P58462                  | SMAENSIPL      | 961.467                     | Forkhead box protein P1                                                    |
| P59016                  | ASLVNADKL      | 930.526                     | Vacuolar protein sorting-associated protein 33B                            |
| P59326                  | GSVVNSVAL      | 845.473                     | YTH domain family protein 1                                                |
| P61161                  | YAGSNFPEHI     | 1134.522                    | Actin-related protein 2                                                    |
| P61982                  | AAMKNVTEL      | 976.514                     | 14-3-3 protein gamma                                                       |
| P70168                  | AALQNLVKI      | 969.61                      | Importin subunit beta-1                                                    |
| P70259                  | LSNIINESL      | 1002.547                    | G-protein coupled receptor 143                                             |
| P70333                  | FSPLNPMRV      | 1060.561                    | Heterogeneous nuclear ribonucleoprotein H2                                 |
| P70372                  | GAVTNVKVI      | 900.552                     | ELAV-like protein 1                                                        |
| P70428                  | ASVSNPLFL      | 947.52                      | Exostosin-2                                                                |
| P80315                  | SSLLSPMSV      | 920.476                     | T-complex protein 1 subunit delta                                          |
| P84089                  | YQPYNKDWI      | 1226.585                    | Enhancer of rudimentary homolog                                            |
| P97313                  | SALINLVEF      | 1005.562                    | DNA-dependent protein kinase catalytic subunit                             |
| P97929                  | HAIENIDTF      | 1059.511                    | Breast cancer type 2 susceptibility protein homolog                        |
| Q01237                  | SGPTNEDLYI     | 1108.516                    | 3-hydroxy-3-methylglutaryl-coenzyme A reductase                            |

|        |               |          |                                                           |
|--------|---------------|----------|-----------------------------------------------------------|
| Q09XV5 | VQVPNLESL     | 998.552  | Chromodomain-helicase-DNA-binding protein 8               |
| Q14DL0 | TALLDEQVL     | 1001.552 | Ubiquilin-like protein                                    |
| Q3SXB8 | DEAANGLMASYL  | 1254.568 | Collectin-11                                              |
| Q3THE2 | SLGKNPTDAYL   | 1178.606 | Myosin regulatory light chain MRLC2                       |
| Q3U3D7 | ASLVNSPSYL    | 1050.547 | Transmembrane protein 131-like                            |
| Q3ULJ0 | GALKNIVAV     | 884.557  | Glycerol-3-phosphate dehydrogenase 1-like protein         |
| Q3UM45 | RAIENIDTL     | 1044.569 | Protein phosphatase 1 regulatory subunit 7                |
| Q3UWM4 | SSIQNGKYTL    | 1110.58  | JmjC domain-containing histone demethylation protein 1D   |
| Q5DU02 | FAVVNHQGTL    | 1085.574 | Ubiquitin carboxyl-terminal hydrolase 22                  |
| Q5EG47 | WKVVNPYYL     | 1181.636 | 5'-AMP-activated protein kinase catalytic subunit alpha-1 |
| Q60585 | VMLENYSHL     | 1105.535 | Zinc finger protein 30                                    |
| Q60597 | SAPVAAEPF     | 888.447  | 2-oxoglutarate dehydrogenase E1 component, mitochondrial  |
| Q60597 | SAPVAAEPFL    | 1001.531 | 2-oxoglutarate dehydrogenase E1 component, mitochondrial  |
| Q61081 | NMPWNVDTL     | 1089.504 | Hsp90 co-chaperone Cdc37                                  |
| Q61191 | SQVINPTAI     | 942.526  | Host cell factor                                          |
| Q61548 | NGVINAAFPM    | 936.461  | Clathrin coat assembly protein AP180                      |
| Q61753 | TGVVNAQAL     | 872.484  | D-3-phosphoglycerate dehydrogenase                        |
| Q64511 | NSMVLFDHM     | 1093.481 | DNA topoisomerase 2-beta                                  |
| Q68FD5 | SAIMNPASKVI   | 1130.624 | Clathrin heavy chain 1                                    |
| Q69ZF8 | ATVSNPFFL     | 905.473  | Male-specific lethal 2 homolog                            |
| Q6RT24 | SALQNAESDRL   | 1203.597 | Centromere-associated protein E                           |
| Q6VNB8 | LASGNPAIV     | 841.478  | WD repeat and FYVE domain-containing protein 3            |
| Q6WKZ8 | SLPTNLIHL     | 1007.589 | E3 ubiquitin-protein ligase UBR2                          |
| Q71LX4 | SVMENSKVLGESM | 1410.661 | Talin-2                                                   |
| Q7TMB8 | YAPLHLVPL     | 1022.604 | Cytoplasmic FMR1-interacting protein 1                    |
| Q7TN89 | SGVGKSALTI    | 932.542  | GTPase ERas                                               |
| Q7TPS5 | AAVLNPRFL     | 1000.594 | Uncharacterized protein KIAA0528                          |
| Q80SU7 | GMIENGPFL     | 977.477  | Interferon-induced very large GTPase 1                    |
| Q80SU7 | ISLKNSQEI     | 1031.574 | Interferon-induced very large GTPase 1                    |
| Q80TG1 | FSLENLRMTNT   | 1325.652 | Uncharacterized protein KIAA1267                          |
| Q80TH2 | GSLKNVTTL     | 932.542  | Protein LAP2                                              |
| Q80U28 | IAPTNAEVL     | 927.515  | MAP kinase-activating death domain protein                |
| Q80VH0 | NSPFNSKFPA    | 1108.543 | B-cell scaffold protein with ankyrin repeats              |
| Q80V11 | AALQNAVAF     | 904.489  | Tripartite motif-containing protein 56                    |
| Q80X90 | PGSANETSSIL   | 1075.527 | Filamin-B                                                 |
| Q80Y17 | VSVANVDLL     | 929.531  | Lethal(2) giant larvae protein homolog 1                  |
| Q80YQ8 | WAVSNREML     | 1105.546 | Protein RMD5 homolog A                                    |
| Q811L6 | SKLANIDYL     | 1036.568 | Microtubule-associated serine/threonine-protein kinase 4  |
| Q8BG67 | SAINEDNL      | 988.495  | Protein EFR3 homolog A                                    |
| Q8BHY8 | IGPKNYEFL     | 1080.573 | Sorting nexin-14                                          |
| Q8BIH0 | AAPINTQGL     | 884.484  | Histone deacetylase complex subunit SAP130                |
| Q8BPI1 | VSLNNAVIVL    | 1041.631 | Protein kintoun                                           |
| Q8BPS4 | SALANYIHL     | 1001.542 | Integral membrane protein GPR180                          |
| Q8BW56 | SSVLNLTTEL    | 975.536  | Glycosyltransferase-like domain-containing protein 1      |
| Q8BX57 | SSIQNFQKGTL   | 1222.643 | PX domain-containing protein kinase-like protein          |
| Q8BZQ7 | AMLTNLESL     | 991.513  | Anaphase-promoting complex subunit 2                      |
| Q8C0L9 | FGIHNGVETL    | 1086.558 | Putative glycerophosphodiester phosphodiesterase 5        |
| Q8C3J5 | KSVENFVSL     | 1022.552 | Dedicator of cytokinesis protein 2                        |
| Q8C3J5 | SMVQNRVFL     | 1093.583 | Dedicator of cytokinesis protein 2                        |
| Q8C3J5 | SQFPNAEKM     | 1051.488 | Dedicator of cytokinesis protein 2                        |
| Q8C4N4 | SAPINSVLL     | 913.536  | PQ-loop repeat-containing protein 2                       |
| Q8C4V1 | MGILNTDTL     | 977.498  | Rho GTPase-activating protein 24                          |
| Q8CDJ3 | SQHVNLDQL     | 1053.533 | Uncharacterized protein KIAA0831                          |
| Q8CDN6 | FQNVNSVTL     | 1021.532 | Thioredoxin-like protein 1                                |
| Q8CEF1 | IQPINHTTL     | 1036.579 | Protein fem-1 homolog C                                   |
| Q8CGC7 | SAVQELLQL     | 1000.568 | Bifunctional aminoacyl-tRNA synthetase                    |
| Q8CGP5 | LAIRNDEEL     | 1072.564 | Histone H2A type 1-F                                      |
| Q8CJF7 | TSVENHEFL     | 1075.506 | AT-hook-containing transcription factor 1                 |
| Q8K1E0 | ASMSNDFKSVL   | 1198.578 | Syntaxin-5                                                |
| Q8K1H7 | AAAKNLSDMTL   | 1134.583 | T-complex protein 11-like protein 2                       |
| Q8K3C0 | NGPQNIYNL     | 1032.511 | Ribonuclease kappa                                        |
| Q8K4G5 | GQLILKEEM     | 1060.571 | Actin-binding LIM protein 1                               |

|        |             |          |                                                                        |
|--------|-------------|----------|------------------------------------------------------------------------|
| Q8R317 | RALSNLESI   | 1002.558 | Ubiquilin-1                                                            |
| Q8R4R6 | AQYGNILKHMV | 1273.673 | Nucleoporin NUP53                                                      |
| Q8VE11 | VGIENIHVM   | 1011.53  | Myotubularin-related protein 6                                         |
| Q8VH51 | FEPFGRIESI  | 1194.616 | RNA-binding protein 39                                                 |
| Q8VIJ8 | SAVKNLQQL   | 1000.579 | UPF0171 protein C16orf35 homolog                                       |
| Q91V83 | QTVENVEHL   | 1068.533 | Uncharacterized protein KIAA0406 homolog                               |
| Q91WG4 | SAPRNFVENF  | 1180.575 | Elongator complex protein 2                                            |
| Q91WM3 | AALLNTDLV   | 929.531  | U3 small nucleolar RNA-interacting protein 2                           |
| Q91WT8 | ISPVNPVAI   | 909.541  | RNA-binding protein 47                                                 |
| Q91XF4 | SAPVNGSVFI  | 990.526  | E3 ubiquitin-protein ligase RNF167                                     |
| Q91XU3 | FAIDDHDYL   | 1108.495 | Phosphatidylinositol-5-phosphate 4-kinase type-2 gamma                 |
| Q922D8 | AGILNGKLV   | 884.557  | C-1-tetrahydrofolate synthase, cytoplasmic                             |
| Q99JF5 | TAPVNIAMI   | 897.541  | Diphosphomevalonate decarboxylase                                      |
| Q99JW2 | FSPMNRTPV   | 1048.525 | Aminoacylase-1                                                         |
| Q99K90 | SSLVNSQTL   | 948.5    | Mitogen-activated protein kinase kinase kinase 7-interacting protein 2 |
| Q99K95 | RSIKNVTEL   | 1059.616 | UPF0549 protein C20orf43 homolog                                       |
| Q99KD5 | SGLQNFEAL   | 978.49   | Protein unc-45 homolog A                                               |
| Q99KN9 | SSPSNMLPV   | 931.456  | Clathrin interactor 1                                                  |
| Q99KV1 | MAPQNLSTF   | 1008.482 | DnaJ homolog subfamily B member 11                                     |
| Q99N16 | SAYLNMFEDI  | 1224.572 | Cytochrome P450 4F3                                                    |
| Q99NH0 | ASVLNVNHI   | 966.537  | Ankyrin repeat domain-containing protein 17                            |
| Q99PL5 | SSIVNSIQVL  | 1059.605 | Ribosome-binding protein 1                                             |
| Q9CQ71 | NELPQFFP    | 991.489  | Replication protein A 14 kDa subunit                                   |
| Q9CR64 | SAIFNFQSL   | 1026.526 | Transmembrane protein 167A                                             |
| Q9D020 | GALKNTDYF   | 1028.505 | Cytosolic 5'-nucleotidase 3                                            |
| Q9D0E1 | GMGFGLERM   | 997.46   | Heterogeneous nuclear ribonucleoprotein M                              |
| Q9D3G9 | YSVANHNSFL  | 1151.549 | Rho-related GTP-binding protein RhoH                                   |
| Q9D6Z1 | VALENANAV   | 900.479  | Nucleolar protein 5A                                                   |
| Q9D757 | AKIQMLDAL   | 1002.566 | Death-associated protein-like 1                                        |
| Q9D868 | SSPVNPVVF   | 945.505  | Peptidyl-prolyl cis-trans isomerase H                                  |
| Q9DB27 | IGIENIHYL   | 1071.584 | Malignant T cell amplified sequence 1                                  |
| Q9DB40 | SGLLNQQSL   | 959.516  | Mediator of RNA polymerase II transcription subunit 27                 |
| Q9DBN5 | VGVNNPVFL   | 958.536  | Peroxisomal Lon protease homolog 2                                     |
| Q9DBR3 | GAVQNIHFL   | 922.511  | Armadillo repeat-containing protein 8                                  |
| Q9EQ32 | YGLKNLTAL   | 992.578  | Phosphoinositide 3-kinase adapter protein 1                            |
| Q9EQU3 | LSHTNILVL   | 1009.605 | Toll-like receptor 9                                                   |
| Q9ERE3 | YSIVNASVL   | 965.531  | Serine/threonine-protein kinase Sgk3                                   |
| Q9ET01 | VGVENVAEL   | 929.494  | Glycogen phosphorylase, liver form                                     |
| Q9JHC9 | SAPSAIALPV  | 925.536  | ETS-related transcription factor Elf-2                                 |
| Q9JKP8 | VSSINQEAL   | 960.5    | Chromatin accessibility complex protein 1                              |
| Q9QVP9 | VAREEVVL    | 914.531  | Protein tyrosine kinase 2 beta                                         |
| Q9QZD9 | FGPINSVAF   | 951.494  | Eukaryotic translation initiation factor 3 subunit I                   |
| Q9R190 | YAPINANAI   | 946.5    | Metastasis-associated protein MTA2                                     |
| Q9R1A8 | YVVDNIDHL   | 1087.542 | E3 ubiquitin-protein ligase RFWD2                                      |
| Q9WTK5 | AALQNLEQL   | 999.548  | Nuclear factor NF-kappa-B p100 subunit                                 |
| Q9WU84 | VQLENQMVV   | 1073.566 | Copper chaperone for superoxide dismutase                              |
| Q9WVH9 | TGPISATLVM  | 989.534  | Fibulin-5                                                              |
| Q9Z1F9 | SMAGNIIPAI  | 986.534  | SUMO-activating enzyme subunit 2                                       |
| Q9Z1T1 | AAPQNFTPSMI | 1176.572 | AP-3 complex subunit beta-1                                            |
| Q9Z2G1 | VQPFNYVTL   | 1080.573 | Protein fem-1 homolog A-A                                              |
| Q9Z2U4 | FSPFNPTSL   | 1009.5   | ETS-related transcription factor Elf-4                                 |



**Supplemental Table 2. TKO H2-D<sup>b</sup> peptides.**

| <b>Accession number</b> | <b>Peptide</b> | <b>mass-to-charge ratio</b> | <b>Protein entry name</b>                                                     |
|-------------------------|----------------|-----------------------------|-------------------------------------------------------------------------------|
| A6PWY4                  | FSPTNPAHLL     | 1096.579                    | WD repeat-containing protein 76                                               |
| O35127                  | SAPENAVRM      | 974.473                     | Protein C10                                                                   |
| O35286                  | FAHIDGDHL      | 1024.485                    | Putative pre-mRNA-splicing factor ATP-dependent RNA helicase DHX15            |
| O35368                  | GTFVNGEFV      | 969.468                     | Interferon-activable protein 203                                              |
| O35484                  | VSPENIIFT      | 1019.541                    | Antizyme inhibitor 1                                                          |
| O35683                  | ISGVNRYVYV     | 1070.564                    | NADH dehydrogenase [ubiquinone] 1 alpha subcomplex subunit 1                  |
| O35737                  | FSPLNPVRV      | 1028.589                    | Heterogeneous nuclear ribonucleoprotein H                                     |
| O35988                  | KAPTNEFYA      | 1040.505                    | Syndecan-4                                                                    |
| O54734                  | GGNINVETI      | 916.474                     | Dolichyl-diphosphooligosaccharide--protein glycosyltransferase 48 kDa subunit |
| O70551                  | ISGVNGTHI      | 897.479                     | Serine/threonine-protein kinase SRPK1                                         |
| O88491                  | ASMINVEYL      | 1039.513                    | Histone-lysine N-methyltransferase, H3 lysine-36 and H4 lysine-20 specific    |
| O89090                  | LQVQNQAQTI     | 1239.67                     | Transcription factor Sp1                                                      |
| P00520                  | SSGINGSFL      | 881.437                     | Proto-oncogene tyrosine-protein kinase ABL1                                   |
| P01899                  | FAYEGRDYI      | 1133.527                    | H-2 class I histocompatibility antigen, D-B alpha chain                       |
| P04441                  | SQMRMATPL      | 1034.513                    | H-2 class II histocompatibility antigen gamma chain                           |
| P07742                  | FQIVNPHLL      | 1080.621                    | Ribonucleoside-diphosphate reductase large subunit                            |
| P08775                  | VTPFNIDRL      | 1074.595                    | DNA-directed RNA polymerase II subunit RPB1                                   |
| P09581                  | FAPKNIYSI      | 1052.578                    | Macrophage colony-stimulating factor 1 receptor                               |
| P10126                  | FAPVNVTTTEV    | 1076.563                    | Elongation factor 1-alpha 1                                                   |
| P10126                  | FAPVNVTTTEVKSV | 1390.758                    | Elongation factor 1-alpha 1                                                   |
| P10126                  | PPMEAAGFTAQVI  | 1331.667                    | Elongation factor 1-alpha 1                                                   |
| P13864                  | LSLENGHTL      | 1084.564                    | DNA (cytosine-5)-methyltransferase 1                                          |
| P14901                  | IQAENAEFM      | 1052.472                    | Heme oxygenase 1                                                              |
| P16277                  | RSLDNGGYI      | 1157.559                    | Tyrosine-protein kinase BLK                                                   |
| P16460                  | FININSLRL      | 1089.642                    | Argininosuccinate synthase                                                    |
| P16546                  | KALINADEL      | 986.552                     | Spectrin alpha chain, brain                                                   |
| P16858                  | SAPSADAPMFVM   | 1223.544                    | Glyceraldehyde-3-phosphate dehydrogenase                                      |
| P16858                  | YGYSNRVVDLM    | 1316.631                    | Glyceraldehyde-3-phosphate dehydrogenase                                      |
| P17918                  | AMGVNLTSM      | 923.433                     | Proliferating cell nuclear antigen                                            |
| P18760                  | SAVISLEGKPL    | 1113.652                    | Cofilin-1                                                                     |
| P19096                  | TALLENLSTL     | 961.521                     | Fatty acid synthase                                                           |
| P19973                  | RQPSIELPSM     | 1157.599                    | Lymphocyte-specific protein 1                                                 |
| P20693                  | TAIQNVSHV      | 968.516                     | Low affinity immunoglobulin epsilon Fc receptor                               |
| P24547                  | GGIQNVGHI      | 894.48                      | Inosine-5'-monophosphate dehydrogenase 2                                      |
| P26039                  | SGPENFQVG      | 934.427                     | Talin-1                                                                       |
| P26039                  | SVMENSKVLGEAM  | 1394.666                    | Talin-1                                                                       |
| P30282                  | AAVIAHDFL      | 956.52                      | G1/S-specific cyclin-D3                                                       |
| P35278                  | AMNVNEIFM      | 1068.486                    | Ras-related protein Rab-5C                                                    |
| P36423                  | LGPKNGVYI      | 960.552                     | Thromboxane-A synthase                                                        |
| P39054                  | YAIKNIHGV      | 1014.574                    | Dynamin-2                                                                     |
| P40694                  | VNNHAFLETL     | 1157.595                    | DNA-binding protein SMUBP-2                                                   |
| P42228                  | SILVNQEVL      | 1014.584                    | Signal transducer and activator of transcription 4                            |
| P46414                  | FGPVNHEEL      | 1041.501                    | Cyclin-dependent kinase inhibitor 1B                                          |
| P47911                  | FSLTNGMYP      | 1029.472                    | 60S ribosomal protein L6                                                      |
| P49718                  | AALPNIYEL      | 1003.546                    | DNA replication licensing factor MCM5                                         |
| P49813                  | SSIVNKEGL      | 946.521                     | Tropomodulin-1                                                                |
| P51943                  | VLLNPPETL      | 1082.61                     | Cyclin-A2                                                                     |
| P54841                  | YQQMNPEAL      | 1093.499                    | Transcription factor MafB                                                     |
| P55264                  | SAVVDKDFL      | 993.526                     | Adenosine kinase                                                              |
| P58462                  | SMAENSIPL      | 961.467                     | Forkhead box protein P1                                                       |
| P58929                  | SSPTSTEYI      | 984.453                     | Glucocorticoid modulatory element-binding protein 2                           |
| P59016                  | ASLVNADKL      | 930.526                     | Vacuolar protein sorting-associated protein 33B                               |
| P61161                  | YAGSNFPEHI     | 1134.522                    | Actin-related protein 2                                                       |
| P61982                  | AAMKNVTEL      | 976.514                     | 14-3-3 protein gamma                                                          |
| P62264                  | FASFNDTFVHV    | 1283.606                    | 40S ribosomal protein S14                                                     |

|        |              |          |                                                                  |
|--------|--------------|----------|------------------------------------------------------------------|
| P62830 | AAGVGDMVM    | 850.38   | 60S ribosomal protein L23                                        |
| P62843 | VG VYNGKTF   | 984.515  | 40S ribosomal protein S15                                        |
| P62855 | FVIRNIVEA    | 1060.616 | 40S ribosomal protein S26                                        |
| P70168 | AALQNLVKI    | 969.61   | Importin subunit beta-1                                          |
| P70372 | FSPMGVDHM    | 1020.428 | ELAV-like protein 1                                              |
| P70372 | GAVTNVKVI    | 900.552  | ELAV-like protein 1                                              |
| P70428 | ASVSNPLFL    | 947.52   | Exostosin-2                                                      |
| P83741 | ASLQNFNISNL  | 1220.628 | Serine/threonine-protein kinase WNK1                             |
| P97313 | SALINLVEF    | 1005.562 | DNA-dependent protein kinase catalytic subunit                   |
| P97384 | AGQFNQDYL    | 1055.48  | Annexin A11                                                      |
| P97929 | HAIENIDTF    | 1059.511 | Breast cancer type 2 susceptibility protein homolog              |
| Q00175 | VGLPNESQAL   | 1027.542 | Progesterone receptor                                            |
| Q01237 | SGPTNEDLYI   | 1108.516 | 3-hydroxy-3-methylglutaryl-coenzyme A reductase                  |
| Q09XV5 | VQVPNLESL    | 998.552  | Chromodomain-helicase-DNA-binding protein 8                      |
| Q0P5W1 | GVHVNQELL    | 1008.548 | Vacuolar protein sorting-associated protein 8 homolog            |
| Q14DL0 | TALLDEQVL    | 1001.552 | Ubiquilin-like protein                                           |
| Q2HXL6 | FMATNPEHL    | 1059.493 | ER degradation-enhancing alpha-mannosidase-like 3                |
| Q3TCJ1 | SQISNTEFL    | 1038.511 | Protein FAM175B                                                  |
| Q3TGF2 | LAPQNKPEL    | 1009.568 | Protein FAM107B                                                  |
| Q3U1N2 | AAVQNPAITAL  | 1068.605 | Sterol regulatory element-binding protein 2                      |
| Q3UHH1 | SQPVNPHSL    | 978.501  | Zinc finger SWIM domain-containing protein KIAA0913              |
| Q3UIK4 | AAPRSFIFL    | 1021.584 | Methyltransferase-like protein KIAA1627                          |
| Q3ULJ0 | GALKNIVAV    | 884.557  | Glycerol-3-phosphate dehydrogenase 1-like protein                |
| Q3UM45 | RAIENIDTL    | 1044.569 | Protein phosphatase 1 regulatory subunit 7                       |
| Q3UWM4 | SSIQNGKYTL   | 1110.58  | JmjC domain-containing histone demethylation protein 1D          |
| Q497V5 | FVRINQDYI    | 1167.616 | S1 RNA-binding domain-containing protein 1                       |
| Q60520 | LVIFNQEVI    | 1074.62  | Paired amphipathic helix protein Sin3a                           |
| Q60585 | VMLENYSHL    | 1105.535 | Zinc finger protein 30                                           |
| Q60597 | SAPVAAEPF    | 888.447  | 2-oxoglutarate dehydrogenase E1 component, mitochondrial         |
| Q60597 | SAPVAAEPFL   | 1001.531 | 2-oxoglutarate dehydrogenase E1 component, mitochondrial         |
| Q60843 | SGPRNPFPPP   | 1065.548 | Krueppel-like factor 2                                           |
| Q60973 | YMPQNPHII    | 1112.556 | Histone-binding protein RBBP7                                    |
| Q60974 | YAMENTRQTI   | 1226.584 | Nuclear receptor corepressor 1                                   |
| Q61191 | SQVINPTAI    | 942.526  | Host cell factor                                                 |
| Q61191 | VMVSNPATRM   | 1105.55  | Host cell factor                                                 |
| Q61286 | STVAASNTEL   | 992.49   | Transcription factor 12                                          |
| Q61419 | VGLTNINVV    | 928.547  | Cytidine monophosphate-N-acetylneuraminic acid hydroxylase       |
| Q61687 | SNYQQIDMRGM  | 1342.588 | Transcriptional regulator ATRX                                   |
| Q62190 | ARSLNYLLYV   | 1211.679 | Macrophage-stimulating protein receptor                          |
| Q62384 | LVTKNPFTL    | 1032.609 | Zinc finger protein ZPR1                                         |
| Q64511 | NSMVLFDHM    | 1093.481 | DNA topoisomerase 2-beta                                         |
| Q68FD5 | SAIMNPASKVI  | 1130.624 | Clathrin heavy chain 1                                           |
| Q69ZK6 | SLLGGHPRL    | 949.558  | Probable JmjC domain-containing histone demethylation protein 2C |
| Q69ZK6 | WQYPNGTHA    | 1073.48  | Probable JmjC domain-containing histone demethylation protein 2C |
| Q6PAC3 | YSPTGKEFV    | 1027.51  | WD repeat and SOF domain-containing protein 1                    |
| Q6RT24 | SALQNAESDRL  | 1203.597 | Centromere-associated protein E                                  |
| Q6VNB8 | LASGNPAIV    | 841.478  | WD repeat and FYVE domain-containing protein 3                   |
| Q6WKZ8 | SLPTNLIHL    | 1007.589 | E3 ubiquitin-protein ligase UBR2                                 |
| Q6ZPV2 | SGLLNPYSL    | 963.515  | Putative DNA helicase INO80 complex homolog 1                    |
| Q7TMB8 | SAPYGRITL    | 977.542  | Cytoplasmic FMR1-interacting protein 1                           |
| Q7TN29 | AQPGASGMLTPM | 1160.544 | Stromal membrane-associated protein 2                            |
| Q7TSA3 | SQVINSHSV    | 970.496  | B- and T-lymphocyte attenuator                                   |
| Q80SU7 | GMIENGPFL    | 977.477  | Interferon-induced very large GTPase 1                           |
| Q80TG1 | FSLENLRMT    | 1110.562 | Uncharacterized protein KIAA1267                                 |
| Q80TG1 | FSLENLRMTNT  | 1325.652 | Uncharacterized protein KIAA1267                                 |
| Q80TH2 | GSLKNVTTL    | 932.542  | Protein LAP2                                                     |
| Q80U28 | IAPTNAEVL    | 927.515  | MAP kinase-activating death domain protein                       |
| Q80WJ6 | MAALGPTVLI   | 985.576  | Multidrug resistance-associated protein 9                        |
| Q8BG67 | SAIINEDNL    | 988.495  | Protein EFR3 homolog A                                           |
| Q8BGF6 | IVGINLTEM    | 989.534  | ELMO domain-containing protein 2                                 |

|        |               |          |                                                                        |
|--------|---------------|----------|------------------------------------------------------------------------|
| Q8BHY8 | IGPKNYEFL     | 1080.573 | Sorting nexin-14                                                       |
| Q8BPS4 | SALANYIHL     | 1001.542 | Integral membrane protein GPR180                                       |
| Q8BQM4 | VSLLDIDHL     | 1024.568 | HEAT repeat-containing protein 3                                       |
| Q8BX02 | GGPENTLVF     | 933.468  | KN motif and ankyrin repeat domain-containing protein 2                |
| Q8BX57 | SSIQNFQKGTL   | 1222.643 | PX domain-containing protein kinase-like protein                       |
| Q8BYZ1 | YQVGNLAGHTL   | 1172.606 | ABI gene family member 3                                               |
| Q8C0L9 | FGIHNGVETL    | 1086.558 | Putative glycerophosphodiester phosphodiesterase 5                     |
| Q8C3J5 | SMVQNRVFL     | 1093.583 | Dedicator of cytokinesis protein 2                                     |
| Q8C3J5 | SQFPNAEKM     | 1051.488 | Dedicator of cytokinesis protein 2                                     |
| Q8C407 | YAPANGDFTFV   | 1201.553 | Protein YIPF4                                                          |
| Q8C4V1 | MGILNTDTL     | 977.498  | Rho GTPase-activating protein 24                                       |
| Q8C9E8 | MSMTNTHL      | 1063.455 | Protein FAM26F                                                         |
| Q8CC15 | MSAVNDEF      | 999.409  | RING1 and YY1-binding protein                                          |
| Q8CDD9 | FSVTNPHTM     | 1033.478 | Uncharacterized protein C1orf103 homolog                               |
| Q8CDJ3 | SQHVNLQQL     | 1053.533 | Uncharacterized protein KIAA0831                                       |
| Q8CGP5 | LAIRNDEEL     | 1072.564 | Histone H2A type 1-F                                                   |
| Q8CJF7 | TSVENHEFL     | 1075.506 | AT-hook-containing transcription factor 1                              |
| Q8JZP2 | FSELNLAAYVTGG | 1341.669 | Synapsin-3                                                             |
| Q8K1E0 | ASMSNDFKSVL   | 1198.578 | Syntaxin-5                                                             |
| Q8K3C0 | NGPQNIYNL     | 1032.511 | Ribonuclease kappa                                                     |
| Q8R081 | YAADNQIYI     | 1070.516 | Heterogeneous nuclear ribonucleoprotein L                              |
| Q8VE11 | VGIENIHVM     | 1011.53  | Myotubularin-related protein 6                                         |
| Q8VIJ8 | SAVKNLQQL     | 1000.579 | UPF0171 protein C16orf35 homolog                                       |
| Q91WG4 | SAPRNFVENF    | 1180.575 | Elongator complex protein 2                                            |
| Q91WM3 | AALLNTDLV     | 929.531  | U3 small nucleolar RNA-interacting protein 2                           |
| Q91XF4 | SAPVNGSVFI    | 990.526  | E3 ubiquitin-protein ligase RNF167                                     |
| Q91XU3 | FAIDDHDYL     | 1108.495 | Phosphatidylinositol-5-phosphate 4-kinase type-2 gamma                 |
| Q91Y74 | GAVKNLTYF     | 1012.547 | CMP-N-acetylneuraminase-beta-galactosamide-alpha-2,3-sialyltransferase |
| Q91YK2 | SSPASTPLSPM   | 1074.514 | Ribosomal RNA processing protein 1 homolog B                           |
| Q91YW3 | SQLVKADEM     | 1020.504 | DnaJ homolog subfamily C member 3                                      |
| Q921M3 | IGLQNGVLL     | 926.568  | Splicing factor 3B subunit 3                                           |
| Q922D8 | AGILNGKLV     | 884.546  | C-1-tetrahydrofolate synthase, cytoplasmic                             |
| Q99J94 | LQVNGVANI     | 927.526  | Solute carrier organic anion transporter family member 1A6             |
| Q99K28 | SSISHSVLSEM   | 1176.557 | ADP-ribosylation factor GTPase-activating protein 2                    |
| Q99K90 | SSLVNSQTL     | 948.5    | Mitogen-activated protein kinase kinase kinase 7-interacting protein 2 |
| Q99KD5 | SGLQNFEAL     | 978.49   | Protein unc-45 homolog A                                               |
| Q99KN9 | FSLMSTNTV     | 999.482  | Clathrin interactor 1                                                  |
| Q99KV1 | MAPQNLSTF     | 1008.482 | DnaJ homolog subfamily B member 11                                     |
| Q99LF4 | ASPEGQDYL     | 979.437  | UPF0027 protein C22orf28 homolog                                       |
| Q99MY8 | VGLINKDSV     | 944.542  | Probable histone-lysine N-methyltransferase ASH1L                      |
| Q99NH0 | ASVLNVNHI     | 966.537  | Ankyrin repeat domain-containing protein 17                            |
| Q9CQU1 | SAPTLEDHF     | 1016.469 | Microfibrillar-associated protein 1                                    |
| Q9CR64 | SAIFNFQSL     | 1026.526 | Transmembrane protein 167A                                             |
| Q9CU65 | YAPDSIYYL     | 1104.525 | Zinc finger MYM-type protein 2                                         |
| Q9CVI2 | VAYMNPAM      | 1009.485 | Protein FAM133B                                                        |
| Q9CXK4 | RSVDNIQFL     | 1091.585 | RAG1-activating protein 1                                              |
| Q9D020 | GALKNTDYF     | 1028.505 | Cytosolic 5'-nucleotidase 3                                            |
| Q9D0E1 | GMGFGLERM     | 997.46   | Heterogeneous nuclear ribonucleoprotein M                              |
| Q9D2L9 | AGVSNIEF      | 949.5    | Protein FAM111A                                                        |
| Q9D2N4 | KVTLNGFLDTL   | 1220.689 | Dystrobrevin alpha                                                     |
| Q9D3G9 | YSVANHNSFL    | 1151.549 | Rho-related GTP-binding protein RhoH                                   |
| Q9D7I0 | TGPPPYHESL    | 1097.527 | Protein shisa-5                                                        |
| Q9D868 | SSPVNPVVF     | 945.505  | Peptidyl-prolyl cis-trans isomerase H                                  |
| Q9D8P7 | SGIIDSDFL     | 966.478  | General transcription factor 3C polypeptide 6                          |
| Q9DB27 | IGIENIHYL     | 1071.584 | Malignant T cell amplified sequence 1                                  |
| Q9DBN5 | VGVNPNVFL     | 958.536  | Peroxisomal Lon protease homolog 2                                     |
| Q9DC50 | IQLMNTAHL     | 1040.556 | Peroxisomal carnitine O-octanoyltransferase                            |
| Q9DCN7 | KSIVNQVFL     | 1047.62  | RING finger and transmembrane domain-containing protein 1              |
| Q9EQ32 | YGLKNLTAL     | 992.578  | Phosphoinositide 3-kinase adapter protein 1                            |
| Q9EQU3 | LSHTNILVL     | 1009.605 | Toll-like receptor 9                                                   |

|        |                |          |                                                                               |
|--------|----------------|----------|-------------------------------------------------------------------------------|
| Q9ERA6 | SAPVNFISA      | 905.473  | Tuftelin-interacting protein 11                                               |
| Q9ES56 | FALKNPFYSL     | 1199.647 | Trafficking protein particle complex subunit 4                                |
| Q9JHC9 | SAPSAIALPV     | 925.536  | ETS-related transcription factor Elf-2                                        |
| Q9JI75 | GAPSNPDVF      | 903.421  | Ribosylidihydronicotinamide dehydrogenase [quinone]                           |
| Q9JJ28 | AALKLGQEL      | 942.562  | Protein flightless-1 homolog                                                  |
| Q9JKP8 | VSSINQEAL      | 960.5    | Chromatin accessibility complex protein 1                                     |
| Q9JM73 | YAPTSGLADGSLTV | 1351.675 | Serum response factor                                                         |
| Q9QWT9 | GAPLNLDL       | 911.52   | Kinesin-like protein KIFC1                                                    |
| Q9QXM0 | KSPTAPPDLYF    | 1235.631 | Abhydrolase domain-containing protein 2                                       |
| Q9QXV3 | LSPANQEIQ      | 928.474  | Inhibitor of growth protein 1                                                 |
| Q9R190 | YAPINANAI      | 946.5    | Metastasis-associated protein MTA2                                            |
| Q9WTK5 | AALQNLEQL      | 999.548  | Nuclear factor NF-kappa-B p100 subunit                                        |
| Q9WTU0 | LSVPNKDTV      | 972.537  | PHD finger protein 2                                                          |
| Q9WTX2 | ISPENHISL      | 1009.532 | Interferon-inducible double stranded RNA-dependent protein kinase activator A |
| Q9Z1F9 | SMAGNIIPAI     | 986.534  | SUMO-activating enzyme subunit 2                                              |
| Q9Z1T1 | AAPQNFTPSMI    | 1176.572 | AP-3 complex subunit beta-1                                                   |
| Q9Z2U4 | FSPFNPTSL      | 1009.5   | ETS-related transcription factor Elf-4                                        |

**Supplemental Table 3. WT H2-K<sup>b</sup> peptides.**

| <b>Accession number</b> | <b>Peptide</b> | <b>mass-to-charge ratio</b> | <b>Protein entry name</b>                                                         |
|-------------------------|----------------|-----------------------------|-----------------------------------------------------------------------------------|
| A2APV2                  | LQYEFTKL       | 1041.562                    | Formin-like protein 2                                                             |
| O08575                  | TIIFHSL        | 943.562                     | Eyes absent homolog 2                                                             |
| O54692                  | STVEFTNL       | 910.452                     | Centromere/kinetochore protein zw10 homolog                                       |
| O55013                  | SALIYSNL       | 880.478                     | Trafficking protein particle complex subunit 3                                    |
| P01867                  | SVHTFPAL       | 871.468                     | Ig gamma-2B chain C region                                                        |
| P15066                  | ETPVYANL       | 906.457                     | Transcription factor jun-D                                                        |
| P21995                  | VAPGYPLL       | 829.482                     | Embigin                                                                           |
| P23116                  | QSIEFSRL       | 979.521                     | Eukaryotic translation initiation factor 3 subunit A                              |
| P29351                  | AQYKFIYV       | 1031.557                    | Tyrosine-protein phosphatase non-receptor type 6                                  |
| P32233                  | AAYEFTTL       | 915.446                     | Developmentally-regulated GTP-binding protein 1                                   |
| P40201                  | RVLIFSQM       | 993.556                     | Chromodomain-helicase-DNA-binding protein 1                                       |
| P40336                  | RSYDFEFM       | 1094.462                    | Vacuolar protein sorting-associated protein 26A                                   |
| P42227                  | ATLVFHNL       | 914.51                      | Signal transducer and activator of transcription 3                                |
| P46978                  | AVLSFSTRL      | 993.573                     | Dolichyl-diphosphooligosaccharide--protein glycosyltransferase subunit STT3A      |
| P47753                  | ISFKFDHL       | 1006.536                    | F-actin-capping protein subunit alpha-1                                           |
| P54823                  | INDFPKL        | 993.541                     | Probable ATP-dependent RNA helicase DDX6                                          |
| P56528                  | ANYEFSQV       | 957.432                     | ADP-ribosyl cyclase 1                                                             |
| P62082                  | VNFEFPEF       | 1028.473                    | 40S ribosomal protein S7                                                          |
| P62245                  | VIVRFLTV       | 946.609                     | 40S ribosomal protein S15a                                                        |
| P63082                  | SAMVFSAM       | 843.375                     | V-type proton ATPase 16 kDa proteolipid subunit                                   |
| P63085                  | VGPRYTNL       | 919.5                       | Mitogen-activated protein kinase 1                                                |
| P97481                  | SNYLFTKL       | 985.536                     | Endothelial PAS domain-containing protein 1                                       |
| Q01237                  | SSFVFSKV       | 873.436                     | 3-hydroxy-3-methylglutaryl-coenzyme A reductase                                   |
| Q07076                  | ATRSFPQL       | 919.5                       | Annexin A7                                                                        |
| Q3TAA7                  | SALRFLNL       | 933.552                     | Serine/threonine kinase 11-interacting protein                                    |
| Q3TJZ6                  | ASPEFTKL       | 892.478                     | Protein FAM98A                                                                    |
| Q3UWM4                  | SNPEFRQL       | 990.501                     | JmjC domain-containing histone demethylation protein 1D                           |
| Q5SWD9                  | RAYLFAHV       | 976.537                     | Pre-rRNA-processing protein TSR1 homolog                                          |
| Q5SYH2                  | SQYVFTEM       | 1004.44                     | Transmembrane protein 199                                                         |
| Q60775                  | LVYQFKEM       | 1057.539                    | ETS-related transcription factor Elf-1                                            |
| Q61107                  | STFVYNSM       | 948.414                     | Guanylate-binding protein 4                                                       |
| Q61471                  | ISYLYNKL       | 1013.567                    | Protein Tob1                                                                      |
| Q61545                  | SNYSYPQV       | 957.432                     | RNA-binding protein EWS                                                           |
| Q62141                  | VFTEVANL       | 892.478                     | Paired amphipathic helix protein Sin3b                                            |
| Q62425                  | VNVDYSKL       | 937.5                       | NADH dehydrogenase [ubiquinone] 1 alpha subcomplex subunit 4                      |
| Q63844                  | VGPRYTQL       | 933.516                     | Mitogen-activated protein kinase 3                                                |
| Q64343                  | VNIEFKDL       | 977.531                     | ATP-binding cassette sub-family G member 1                                        |
| Q64475                  | SVYVYKVL       | 970.561                     | Histone H2B type 1-B                                                              |
| Q64693                  | SGPQFVQL       | 875.463                     | POU domain class 2-associating factor 1                                           |
| Q689Z5                  | TAPEYVFL       | 939.483                     | Protein strawberry notch homolog 1                                                |
| Q68FF0                  | IAVPFLKDAVS    | 1159.673                    | Uncharacterized protein KIAA1841                                                  |
| Q6GQT6                  | SGYDFSRL       | 944.448                     | Sterol regulatory element-binding protein cleavage-activating protein             |
| Q6PJN8                  | TAPQYYRL       | 1011.526                    | DALR anticodon-binding domain-containing protein 3                                |
| Q6WKZ8                  | VAYKFPEL       | 966.53                      | E3 ubiquitin-protein ligase UBR2                                                  |
| Q71B07                  | SVVAFHNL       | 886.479                     | Protein dpy-19 homolog 3                                                          |
| Q76MZ3                  | VADKFTL        | 922.489                     | Serine/threonine-protein phosphatase 2A 65 kDa regulatory subunit A alpha isoform |
| Q791N7                  | TSVVFNKL       | 907.525                     | DNA-directed RNA polymerase I subunit RPA12                                       |
| Q7M6Y3                  | VAFDFTKV       | 926.499                     | Phosphatidylinositol-binding clathrin assembly protein                            |
| Q7TNB8                  | SAPEYVFL       | 925.467                     | Protein strawberry notch homolog 2                                                |
| Q80SU7                  | RQYIFSKL       | 1054.605                    | Interferon-induced very large GTPase 1                                            |
| Q80SU7                  | VNSIFQHL       | 957.516                     | Interferon-induced very large GTPase 1                                            |
| Q8BMI0                  | SAFSFRTL       | 928.489                     | F-box only protein 38                                                             |
| Q8BU03                  | FAYRFSNL       | 1017.516                    | Periodic tryptophan protein 2 homolog                                             |
| Q8BVK9                  | VNLREYPSL      | 1090.59                     | Sp110 nuclear body protein                                                        |
| Q8BW96                  | KIFEFKTEL      | 1154.646                    | Calcium/calmodulin-dependent protein kinase type 1D                               |

|        |            |          |                                                                        |
|--------|------------|----------|------------------------------------------------------------------------|
| Q8C4B4 | HIYFEPQL   | 1046.531 | Protein unc-119 homolog B                                              |
| Q8C5N3 | ASPIFTHV   | 871.468  | Nucampholin homolog                                                    |
| Q8CD15 | VVYIYHSL   | 993.541  | Myc-induced nuclear antigen                                            |
| Q8CDD8 | INFDNFNTI  | 983.484  | BTB/POZ domain-containing protein KCTD20                               |
| Q8CFI7 | IGPTYYYQRL | 1110.595 | DNA-directed RNA polymerase II subunit RPB2                            |
| Q8CG47 | AALDFKNV   | 877.478  | Structural maintenance of chromosomes protein 4                        |
| Q8K2H4 | INQIYEARV  | 1105.601 | ARFGAP with coiled-coil, ANK repeat and PH domain-containing protein 1 |
| Q8K3I9 | SRVSFTSL   | 896.484  | Glucocorticoid-induced transcript 1 protein                            |
| Q8K3W0 | ATQVYPKL   | 919.525  | Protein BRE                                                            |
| Q8K4Z5 | RNYQDFDL   | 1102.532 | Splicing factor 3 subunit 1                                            |
| Q8QZX2 | TSYRFLAL   | 970.536  | Uncharacterized protein C4orf15 homolog                                |
| Q8VCP8 | SGLKYVNV   | 879.494  | Adenylate kinase isoenzyme 6                                           |
| Q8VDD5 | RVAEFTTNL  | 1050.558 | Myosin-9                                                               |
| Q8VG04 | TVPSFTAGSI | 979.51   | Olfactory receptor 478                                                 |
| Q91V92 | SIANFTNV   | 865.442  | ATP-citrate synthase                                                   |
| Q91VM3 | SSPKFSEI   | 894.457  | WD repeat domain phosphoinositide-interacting protein 4                |
| Q91WT4 | AIVEFATV   | 849.472  | DnaJ homolog subfamily C member 17                                     |
| Q920Q4 | VSFTYRYL   | 1048.547 | Vacuolar protein sorting-associated protein 16 homolog                 |
| Q922P9 | AWIKVEQL   | 986.568  | Nuclear protein NP60                                                   |
| Q924N4 | SAARFALL   | 848.499  | Solute carrier family 12 member 6                                      |
| Q99KC8 | AVYSFEAL   | 899.452  | Loss of heterozygosity 11 chromosomal region 2 gene A protein homolog  |
| Q99ME9 | QILSDFPKL  | 1060.604 | Nucleolar GTP-binding protein 1                                        |
| Q99P81 | SSYFFGKL   | 948.483  | ATP-binding cassette sub-family G member 3                             |
| Q99PQ1 | ISYQFSNL   | 971.484  | Tripartite motif-containing protein 12                                 |
| Q9CPV7 | SVIKFENL   | 949.536  | Probable palmitoyltransferase ZDHHC6                                   |
| Q9CZM2 | STYKFFEY   | 1020.504 | 60S ribosomal protein L15                                              |
| Q9D0E1 | GQLLFDPRM  | 1076.556 | Heterogeneous nuclear ribonucleoprotein M                              |
| Q9D6T0 | TSVRFTQL   | 951.526  | Nitric oxide synthase-interacting protein                              |
| Q9D7G0 | VSYLFSHV   | 951.494  | Ribose-phosphate pyrophosphokinase 1                                   |
| Q9D8E6 | VNFVHTNL   | 943.5    | 60S ribosomal protein L4                                               |
| Q9D902 | SGYKFGVL   | 870.472  | General transcription factor IIE subunit 2                             |
| Q9DBT5 | VGYRYETL   | 1000.51  | AMP deaminase 2                                                        |
| Q9DBZ5 | VGITYQHI   | 930.505  | Eukaryotic translation initiation factor 3 subunit K                   |
| Q9DCF9 | VAFAYKNV   | 911.499  | Translocon-associated protein subunit gamma                            |
| Q9EQ06 | TAYEFAKL   | 942.494  | Estradiol 17-beta-dehydrogenase 11                                     |
| Q9ESC7 | RAYLFNSV   | 969.516  | Protein yippee-like 1                                                  |
| Q9ESG6 | QSVNYSKL   | 938.495  | P2Y purinoceptor 14                                                    |
| Q9JHI7 | QTYDYRNI   | 1072.506 | Exosome complex exonuclease RRP45                                      |
| Q9JHI9 | TGYAYTQGL  | 973.463  | Solute carrier family 40 member 1                                      |
| Q9JHU4 | ASYEFVQRL  | 1112.574 | Cytoplasmic dynein 1 heavy chain 1                                     |
| Q9JHU9 | SIVSYNHL   | 932.484  | Inositol-3-phosphate synthase 1                                        |
| Q9JL26 | LQYEFTHL   | 1050.526 | Formin-like protein 1                                                  |
| Q9JLV5 | RSPEYLSL   | 964.51   | Cullin-3                                                               |
| Q9QXB9 | ASYEFTTL   | 931.441  | Developmentally-regulated GTP-binding protein 2                        |
| Q9R1T2 | HGYTFANL   | 922.442  | SUMO-activating enzyme subunit 1                                       |
| Q9WUR2 | SSYTFPKM   | 960.45   | Peroxisomal 3,2-trans-enoyl-CoA isomerase                              |
| Q9Z2C4 | SAFEFNEL   | 956.437  | Myotubularin-related protein 1                                         |
| Q9Z2R9 | SSIVFAEL   | 865.467  | Eukaryotic translation initiation factor 2-alpha kinase 1              |

**Supplemental Table 4. TKO H2-K<sup>b</sup> peptides.**

| <b>Accession number</b> | <b>Peptide</b> | <b>mass-to-charge ratio</b> | <b>Protein entry name</b>                                                         |
|-------------------------|----------------|-----------------------------|-----------------------------------------------------------------------------------|
| A2APV2                  | LQYEFTKL       | 1041.562                    | Formin-like protein 2                                                             |
| O54692                  | STVEFTNL       | 910.452                     | Centromere/kinetochore protein zw10 homolog                                       |
| O55222                  | SGIDFKQL       | 907.489                     | Integrin-linked protein kinase                                                    |
| O70591                  | VIAGFNRL       | 889.526                     | Prefoldin subunit 2                                                               |
| O88653                  | QVVQFNRL       | 1003.569                    | Mitogen-activated protein kinase scaffold protein 1                               |
| O89053                  | VNPKFMAL       | 919.508                     | Coronin-1A                                                                        |
| P01887                  | KTVYWDRDM      | 1213.568                    | Beta-2-microglobulin                                                              |
| P0C6F1                  | WIRQYPAL       | 1046.579                    | Dynein heavy chain 2, axonemal                                                    |
| P15066                  | ETPVYANL       | 906.457                     | Transcription factor jun-D                                                        |
| P15307                  | TTLIFQKL       | 963.588                     | C-Rel proto-oncogene protein                                                      |
| P21995                  | VAPGYPLL       | 829.482                     | Embigin                                                                           |
| P26039                  | SNPEFSSV       | 866.39                      | Talin-1                                                                           |
| P27641                  | RQYMFSSL       | 1031.498                    | ATP-dependent DNA helicase 2 subunit 2                                            |
| P29351                  | AQYKFIYV       | 1031.557                    | Tyrosine-protein phosphatase non-receptor type 6                                  |
| P29533                  | ISPEYKTI       | 950.52                      | Vascular cell adhesion protein 1                                                  |
| P32233                  | AAYEFTTL       | 915.446                     | Developmentally-regulated GTP-binding protein 1                                   |
| P35980                  | KILTFDQL       | 977.567                     | 60S ribosomal protein L18                                                         |
| P40201                  | RVLIFSQM       | 993.556                     | Chromodomain-helicase-DNA-binding protein 1                                       |
| P40336                  | RSYDFEFM       | 1094.462                    | Vacuolar protein sorting-associated protein 26A                                   |
| P42227                  | ATLVFHNL       | 914.51                      | Signal transducer and activator of transcription 3                                |
| P50396                  | SAFDENFM       | 960.377                     | Rab GDP dissociation inhibitor alpha                                              |
| P54823                  | INFDFPKL       | 993.541                     | Probable ATP-dependent RNA helicase DDX6                                          |
| P56528                  | ANYEFSQV       | 957.432                     | ADP-ribosyl cyclase 1                                                             |
| P63085                  | VGPRYTNL       | 919.5                       | Mitogen-activated protein kinase 1                                                |
| P68369                  | ERPTYTNL       | 993.5                       | Tubulin alpha-1A chain                                                            |
| P97370                  | VGYRQPLV       | 931.537                     | Sodium/potassium-transporting ATPase subunit beta-3                               |
| P97479                  | TNLIYQQV       | 978.526                     | Myosin-VIIa                                                                       |
| P97481                  | SNYLFTKL       | 985.536                     | Endothelial PAS domain-containing protein 1                                       |
| Q01237                  | SSFVFSTV       | 873.436                     | 3-hydroxy-3-methylglutaryl-coenzyme A reductase                                   |
| Q02248                  | RTYTYEKL       | 1073.563                    | Catenin beta-1                                                                    |
| Q08093                  | IGPDFQKGL      | 974.531                     | Calponin-2                                                                        |
| Q08943                  | TQYTFSSI       | 946.452                     | FACT complex subunit SSRP1                                                        |
| Q09014                  | EIYEFHKM       | 1096.514                    | Neutrophil cytosol factor 1                                                       |
| Q3TEA8                  | VSQYYPKL       | 997.536                     | Heterochromatin protein 1-binding protein 3                                       |
| Q3TGF2                  | NAPEFVKV       | 903.494                     | Protein FAM107B                                                                   |
| Q3TJZ6                  | ASPEFTKL       | 892.478                     | Protein FAM98A                                                                    |
| Q3TLH4                  | FQQEFPSL       | 995.484                     | BAT2 domain-containing protein 1                                                  |
| Q3UWM4                  | SNPEFRQL       | 990.501                     | JmjC domain-containing histone demethylation protein 1D                           |
| Q5SYH2                  | SQYVFTEM       | 1004.44                     | Transmembrane protein 199                                                         |
| Q61107                  | STFVYNSM       | 948.414                     | Guanylate-binding protein 4                                                       |
| Q61545                  | SNYSYPQV       | 957.432                     | RNA-binding protein EWS                                                           |
| Q62425                  | VNVDYSKL       | 937.5                       | NADH dehydrogenase [ubiquinone] 1 alpha subcomplex subunit 4                      |
| Q64343                  | VNIEFKDL       | 977.531                     | ATP-binding cassette sub-family G member 1                                        |
| Q64475                  | SVYVYKVL       | 970.561                     | Histone H2B type 1-B                                                              |
| Q64693                  | SGPQFVQL       | 875.463                     | POU domain class 2-associating factor 1                                           |
| Q689Z5                  | TAPEYVFL       | 939.483                     | Protein strawberry notch homolog 1                                                |
| Q68FL6                  | VSPLFQKL       | 931.562                     | Methionyl-tRNA synthetase, cytoplasmic                                            |
| Q6GQT6                  | SGYDFSRL       | 944.448                     | Sterol regulatory element-binding protein cleavage-activating protein             |
| Q6NSR3                  | SGPTYIKL       | 878.499                     | Uncharacterized aarF domain-containing protein kinase 2                           |
| Q6PA06                  | TNPSFDGRL      | 1006.496                    | Atlastin-2                                                                        |
| Q6PCN7                  | SGFVFTRL       | 926.51                      | Helicase-like transcription factor                                                |
| Q6ZQH8                  | VAPSFQTL       | 791.43                      | Nucleoporin NUP188 homolog                                                        |
| Q71B07                  | SVVAFHNL       | 886.479                     | Protein dpy-19 homolog 3                                                          |
| Q76LS9                  | VNVRFTGV       | 891.505                     | Protein FAM63A                                                                    |
| Q76MZ3                  | VADKFTLE       | 922.489                     | Serine/threonine-protein phosphatase 2A 65 kDa regulatory subunit A alpha isoform |
| Q7M6Y3                  | VAFDFTKV       | 926.499                     | Phosphatidylinositol-binding clathrin assembly protein                            |

|        |           |          |                                                                    |
|--------|-----------|----------|--------------------------------------------------------------------|
| Q7TMW6 | VAYGFRNI  | 939.505  | Nuclear prelamin A recognition factor-like protein                 |
| Q7TNB8 | SAPEYVFL  | 925.467  | Protein strawberry notch homolog 2                                 |
| Q80SU7 | VNSIFQHL  | 957.516  | Interferon-induced very large GTPase 1                             |
| Q80TM9 | TNQDFIQR  | 1134.591 | Nischarin                                                          |
| Q80VD1 | SSPEFSEL  | 895.405  | Protein FAM98B                                                     |
| Q80W47 | SGYKFFSL  | 948.483  | WD repeat domain phosphoinositide-interacting protein 2            |
| Q80XH2 | LEQRFLLE  | 1047.573 | Interphotoreceptor matrix proteoglycan 2                           |
| Q8BGF7 | KNYDFAQVL | 1097.563 | PAB-dependent poly(A)-specific ribonuclease subunit 2              |
| Q8BJW5 | IAVSFREL  | 934.536  | Nucleolar protein 11                                               |
| Q8BLB7 | ITPPGYSHV | 970.5    | Lethal(3)malignant brain tumor-like 3 protein                      |
| Q8BLR9 | TNLVYPAL  | 890.499  | Hypoxia-inducible factor 1-alpha inhibitor                         |
| Q8BNA6 | LNRNFTSL  | 964.522  | Protocadherin Fat 3                                                |
| Q8BXZ1 | VVPEYVTL  | 919.514  | Protein disulfide-isomerase TXNDC10                                |
| Q8C4B4 | HIYEFPQL  | 1046.531 | Protein unc-119 homolog B                                          |
| Q8C570 | VIYPMAVV  | 891.501  | mRNA export factor                                                 |
| Q8C5N3 | ASPIFTHV  | 871.468  | Nucampholin homolog                                                |
| Q8CEC6 | KVLEFERV  | 1019.589 | Peptidylprolyl isomerase domain and WD repeat-containing protein 1 |
| Q8CFB4 | STFVYNTM  | 962.429  | Guanylate-binding protein 5                                        |
| Q8CG47 | AALDFKNV  | 877.478  | Structural maintenance of chromosomes protein 4                    |
| Q8K0L2 | SVYTHSYL  | 969.468  | Ectonucleoside triphosphate diphosphohydrolase 8                   |
| Q8K2X8 | VIAELVNV  | 856.514  | General transcription factor IIH subunit 5                         |
| Q8K3B1 | RGYEFGLV  | 940.489  | F-box/SPRY domain-containing protein 1                             |
| Q8K3W0 | ATQVYPKL  | 919.525  | Protein BRE                                                        |
| Q8K4Z5 | RNYQDFDL  | 1102.532 | Splicing factor 3 subunit 1                                        |
| Q8VCP8 | SGLKYVNV  | 879.494  | Adenylate kinase isoenzyme 6                                       |
| Q91V92 | SIANFTNV  | 865.442  | ATP-citrate synthase                                               |
| Q91VM3 | SSPKFSEI  | 894.457  | WD repeat domain phosphoinositide-interacting protein 4            |
| Q920Q4 | VSFTYRYL  | 1048.547 | Vacuolar protein sorting-associated protein 16 homolog             |
| Q922P9 | AWIKVEQL  | 986.568  | Nuclear protein NP60                                               |
| Q924N4 | SAARFALL  | 848.499  | Solute carrier family 12 member 6                                  |
| Q99JY9 | STPEFYQV  | 970.452  | Actin-related protein 3                                            |
| Q99KH8 | ISPLFAEL  | 889.504  | Serine/threonine-protein kinase 24                                 |
| Q99P81 | SSYFFGKL  | 948.483  | ATP-binding cassette sub-family G member 3                         |
| Q9CPV7 | SVIKFENL  | 949.536  | Probable palmitoyltransferase ZDHHC6                               |
| Q9CR47 | SSPLYTTL  | 881.462  | Ribosome biogenesis protein NSA2 homolog                           |
| Q9CX84 | TSPTYRSL  | 924.479  | Regulator of G-protein signaling 19                                |
| Q9CZM2 | STYKFFEVE | 1020.504 | 60S ribosomal protein L15                                          |
| Q9D6T0 | TSVRFTQL  | 951.526  | Nitric oxide synthase-interacting protein                          |
| Q9D6Y4 | SSVYFRSV  | 944.484  | UPF0402 protein                                                    |
| Q9D7G0 | VSYLFSHV  | 951.494  | Ribose-phosphate pyrophosphokinase 1                               |
| Q9D8E6 | VNFVHTNL  | 943.5    | 60S ribosomal protein L4                                           |
| Q9DBU3 | SNHVFNAL  | 901.453  | Serine/threonine-protein kinase RIO3                               |
| Q9ESC7 | RAYLFNSV  | 969.516  | Protein yippee-like 1                                              |
| Q9JHU4 | ASYEFVQRL | 1112.574 | Cytoplasmic dynein 1 heavy chain 1                                 |
| Q9JL26 | LQYEFTHL  | 1050.526 | Formin-like protein 1                                              |
| Q9JLV5 | RSPEYLSL  | 964.51   | Cullin-3                                                           |
| Q9QXB9 | ASYEFTTL  | 931.441  | Developmentally-regulated GTP-binding protein 2                    |
| Q9QXK3 | ATYIFNGL  | 898.467  | Coatomer subunit gamma-2                                           |
| Q9WU28 | SMYVPGKL  | 894.476  | Prefoldin subunit 5                                                |
| Q9Z2C4 | SAFEFNEL  | 956.437  | Myotubularin-related protein 1                                     |
| Q9Z2R9 | SSIVFAEL  | 865.467  | Eukaryotic translation initiation factor 2-alpha kinase 1          |
